# Supplementary material
Source: PubMed Central journal article supplement (PMC4968908)
Supplement: kccy-15-14-1189040-s001.pdf [file kccy-15-14-1189040-s001.pdf]

## **Supplementary Information**

### **Regulation of monocyte induced cell migration by the RNA binding protein, FXR1**

O. Le Tonqueze, S. Kollu, S. Lee, M. Al-Salah, S.S. Truesdell, and S. Vasudevan

Center for Cancer Research, Massachusetts General Hospital, Harvard Medical School, Boston, MA 02114.

1. Supplemental Figures S1-S2
2. Supplemental Figure legends
3. Supplemental Table legends
4. Supplemental Tables S1-S3 (related to Figs. 2-3, excel files)

# S1

| Type                                      | Gene Ontology category description | number of genes | Benjamini |
|-------------------------------------------|------------------------------------|-----------------|-----------|
| <b>Cluster 1 (Enrichment Score: 6.98)</b> |                                    |                 |           |
| BP                                        | response to wounding               | 58              | 7.10E-05  |
| BP                                        | defense response                   | 63              | 9.40E-05  |
| BP                                        | inflammatory response              | 39              | 7.20E-04  |
| <b>Cluster 2 (Enrichment Score: 3.81)</b> |                                    |                 |           |
| CC                                        | extracellular region               | 137             | 9.00E-03  |
| CC                                        | extracellular region part          | 75              | 7.30E-03  |
| CC                                        | extracellular space                | 57              | 1.00E-02  |
| <b>Cluster 3 (Enrichment Score: 3.41)</b> |                                    |                 |           |
| CC                                        | intrinsic to plasma membrane       | 91              | 9.80E-03  |
| CC                                        | integral to plasma membrane        | 89              | 8.00E-03  |
| CC                                        | plasma membrane                    | 232             | 9.80E-03  |
| CC                                        | plasma membrane part               | 136             | 1.50E-01  |

| <b>GOTERM</b> | <b>Term</b>                                      | <b>Count</b> | <b>%</b> | <b>P-Value</b> | <b>Benjamini</b> |
|---------------|--------------------------------------------------|--------------|----------|----------------|------------------|
| BP_FAT        | Defense response                                 | 62           | 6.4      | 5.1E-8         | 1.4E-4           |
| BP_FAT        | Response to wounding                             | 56           | 5.8      | 5.3E-8         | 7.5E-5           |
| BP_FAT        | Immune response                                  | 64           | 6.6      | 6.0E-7         | 5.7E-4           |
| BP_FAT        | Inflammatory response                            | 38           | 3.9      | 9.6E-7         | 6.8E-4           |
| CC_FAT        | Intermediate filament cytoskeleton               | 25           | 2.6      | 1.4E-5         | 5.1E-3           |
| CC_FAT        | Intermediate filament                            | 24           | 2.5      | 3.0E-5         | 5.3E-3           |
| MF_FAT        | Chemokine activity                               | 11           | 1.1      | 5.9E-5         | 4.5E-2           |
| CC_FAT        | Extracellular region                             | 135          | 13.9     | 6.7E-5         | 8.0E-3           |
| CC_FAT        | External side of plasma membrane                 | 22           | 2.3      | 8.4E-5         | 7.5E-3           |
| CC_FAT        | Extracellular region part                        | 74           | 7.6      | 9.2E-5         | 6.6E-3           |
| BP_FAT        | Cell surface receptor linked signal transduction | 124          | 12.7     | 9.3E-5         | 5.2E-2           |
| MF_FAT        | Chemokine receptor binding                       | 11           | 1.1      | 1.0E-4         | 4.0E-2           |
| CC_FAT        | Intrinsic to plasma membrane                     | 88           | 9.0      | 1.6E-4         | 9.4E-3           |
| CC_FAT        | Plasma membrane                                  | 227          | 23.3     | 1.6E-4         | 8.2E-3           |
| MF_FAT        | Endopeptidase activity                           | 36           | 3.7      | 1.8E-4         | 4.6E-2           |
| CC_FAT        | Extracellular space                              | 56           | 5.8      | 1.8E-4         | 8.3E-3           |
| CC_FAT        | Integral to plasma membrane                      | 86           | 8.8      | 2.0E-4         | 7.9E-3           |

## **Supplemental Figure Legends**

### **Figure S1 Gene Ontology (GO) analysis of the differential gene expression profiling of FXR1**

**regulated mRNAs in control and FXR1 knockdown THP1 monocytes** GO analysis of genes that are deregulated in FXR1 depleted cells compared with control shRNA cells, grown in 24 h serum-starvation (S- 24h) conditions was performed using the DAVID tool, as previously conducted<sup>1</sup>. BP, biological pathway; CC, cellular component; MF, molecular function.

### **Figure S2 Immune response genes, including cytokines and chemokines, are regulated by FXR1**

GO analysis for differentially expressed immune and signaling genes in serum-starved cells (S-24 h) was performed using the DAVID tool, as previously conducted<sup>1</sup>. Immune response associated genes in serum-starved cells (S-24 h) are observed to be significantly affected by FXR1 depletion (highlighted in yellow) (Tables S2B, S3).

## **Supplemental Table Legends (Supplemental Tables are separate excel files)**

### **Table S1 Microarray comparison of RNAs affected by FXR1 knockdown compared to control shRNA in serum grown and 24 h serum-starved THP1 cells (related to Figs. 2-3)**

Table S1 is the microarray dataset comparing the RNAs from shFXR1 cells to shCtrl cells in S+ and S- 24 h conditions. Total RNA was extracted from these samples. The synthesized cDNA probe (WT Expression Kit; Ambion) was hybridized to GeneChip Human Gene ST 2.0 Arrays (Affymetrix) by the Partners Healthcare Center for Personalized Genetic Medicine Microarray facility. A 1.5 fold change in expression was used as the cutoff to determine differentially regulated genes.

**Table S2A-B Differentially regulated mRNAs upon FXR1 depletion in S+ and S-24 h conditions (related to Figs. 2-3)**

Table S2A and S2B are the microarray results of mRNAs that are differentially regulated in FXR1 knockdown compared with shCtrl cells, grown in S+ (Table S2A) and S-24 h (Table S2B) conditions respectively. A 1.5 fold change in expression was used as the cutoff to determine differentially regulated genes.

**Table S3 Immune response genes are affected in FXR1 knockdown compared with control shRNA THP1 cells in 24 h serum-starvation conditions (related to Figs. 2-3)**

Table S3 is the microarray results of mRNAs encoding immune response genes that are significantly affected in FXR1 knockdown compared with shCtrl cells in S-24 h serum-starvation conditions (from Table S2B). A 1.5 fold change in expression was used as the cutoff to determine differentially regulated genes. Gene Ontology (GO) analysis for differentially expressed genes was performed with the DAVID tool as previously conducted<sup>1</sup>.

Reference List

1. Lee, S. *et al.* Upregulation of eIF5B controls cell-cycle arrest and specific developmental stages. *Proc. Natl. Acad. Sci. U. S. A* **111**, E4315-E4322 (2014).
